# Supplementary material
Source: PubMed Central journal article supplement (PMC3616528)
Supplement: mt2012287x1.pdf [file mt2012287x1.pdf]

## SUPPLEMENTARY FIGURES

**Title:** SR-A and SREC-I are Kupffer and endothelial cell receptors for helper-dependent adenoviral vectors

**Authors:** Pasquale Piccolo<sup>1</sup>, Francesco Vetrini<sup>2</sup>, Pratibha Mithbaokar<sup>1</sup>, Nathan C. Grove<sup>2</sup>, Terry Bertin<sup>2</sup>, Donna Palmer<sup>2</sup>, Philip Ng<sup>2</sup> and Nicola Brunetti-Pierri<sup>1,3</sup>.

**Institutions:** <sup>1</sup>Telethon Institute of Genetics and Medicine, Naples, Italy; <sup>2</sup>Department of Human and Molecular Genetics, Baylor College of Medicine, Houston, TX, USA; <sup>3</sup>Department of Pediatrics, Federico II University of Naples, Italy.

**Figure S1.** Clearance of HDAd in saline or poly[I] pre-treated wild type C57BL/6 mice.

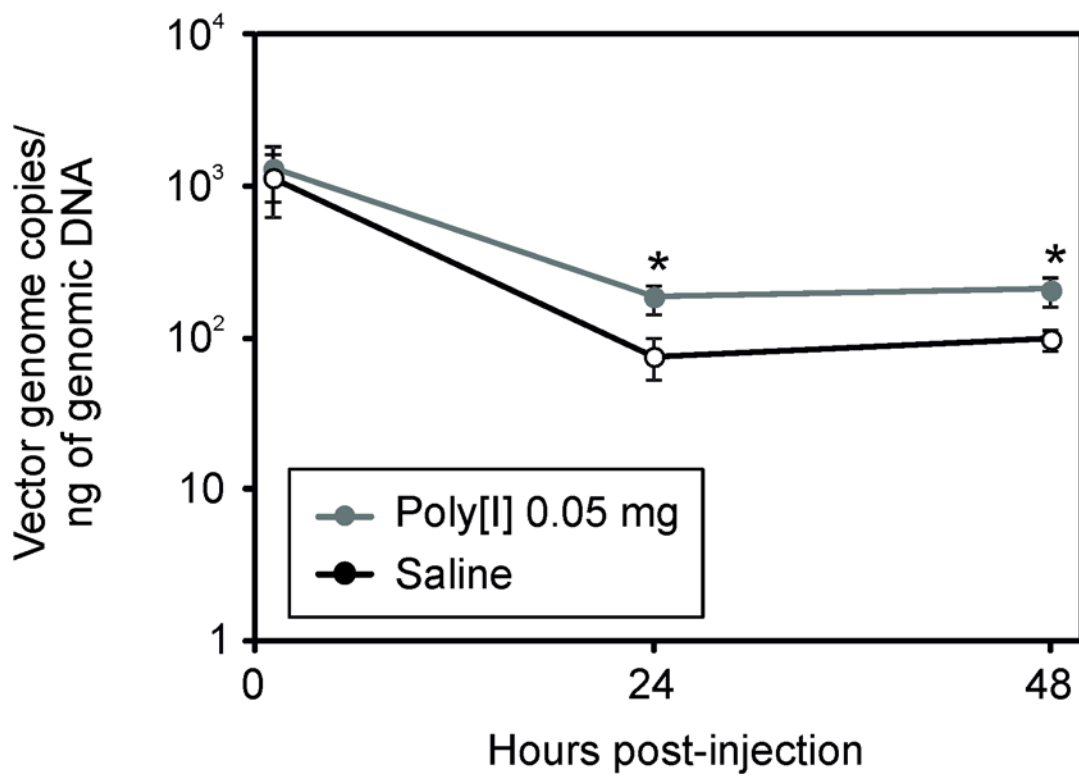

Hepatic HDAd genome copy number in animals pre-treated with poly[I] is approximately 2.5 fold higher (*t*-test: \**p*<0.05; *n*=3 per group) at 24 and 48 hours post-injection as compared to saline pre-treated animals.

**Figure S2.** Alexa555-HDAd infectivity.

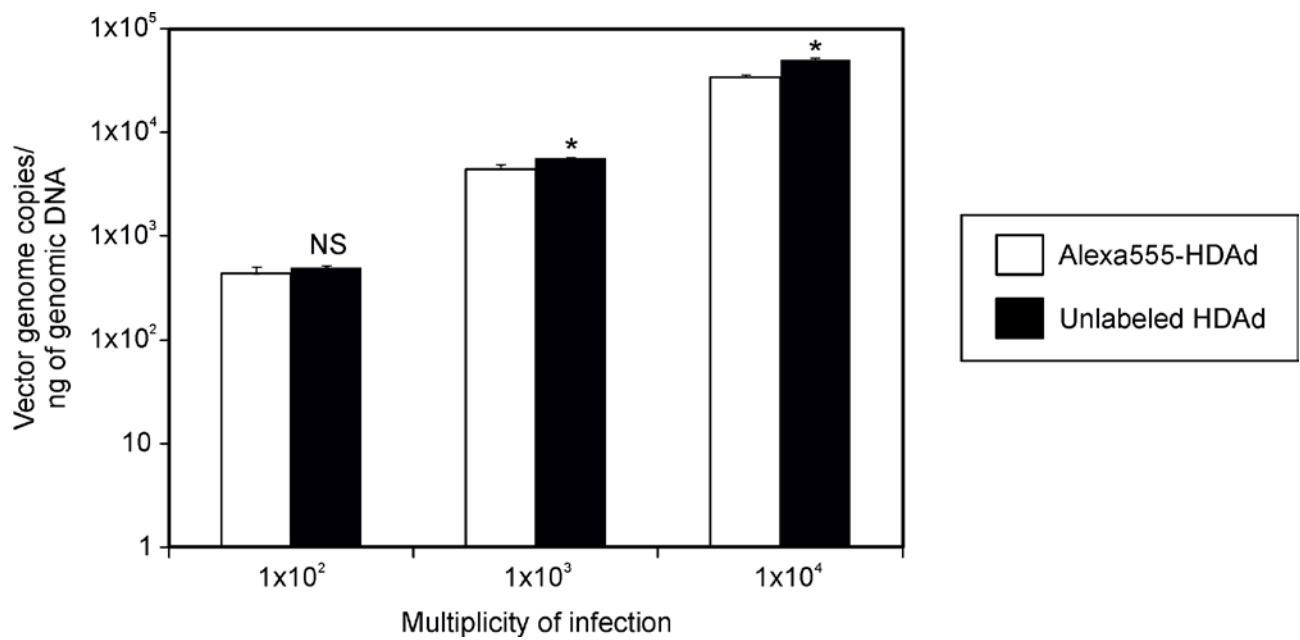

Real time PCR for HDAd copy number in J774A.1 cells infected at different MOI with Alexa555-HDAd or with an unlabeled HDAd. No significant differences were observed with the MOI of  $10^2$  vp/cell. At the MOI of  $10^3$  and  $10^4$  vp/cell, labeled HDAd showed a decrease in infectivity of 27% and 35% respectively compared to unlabeled HDAd (*t*-test: \* $p < 0.01$ ;  $n = 3$  per group). The differences in infectivity observed are within the range of variability in infectivity among vector lots.

**Figure S3.** SREC-I and SR-A co-localize with HDAd vector in mouse livers.

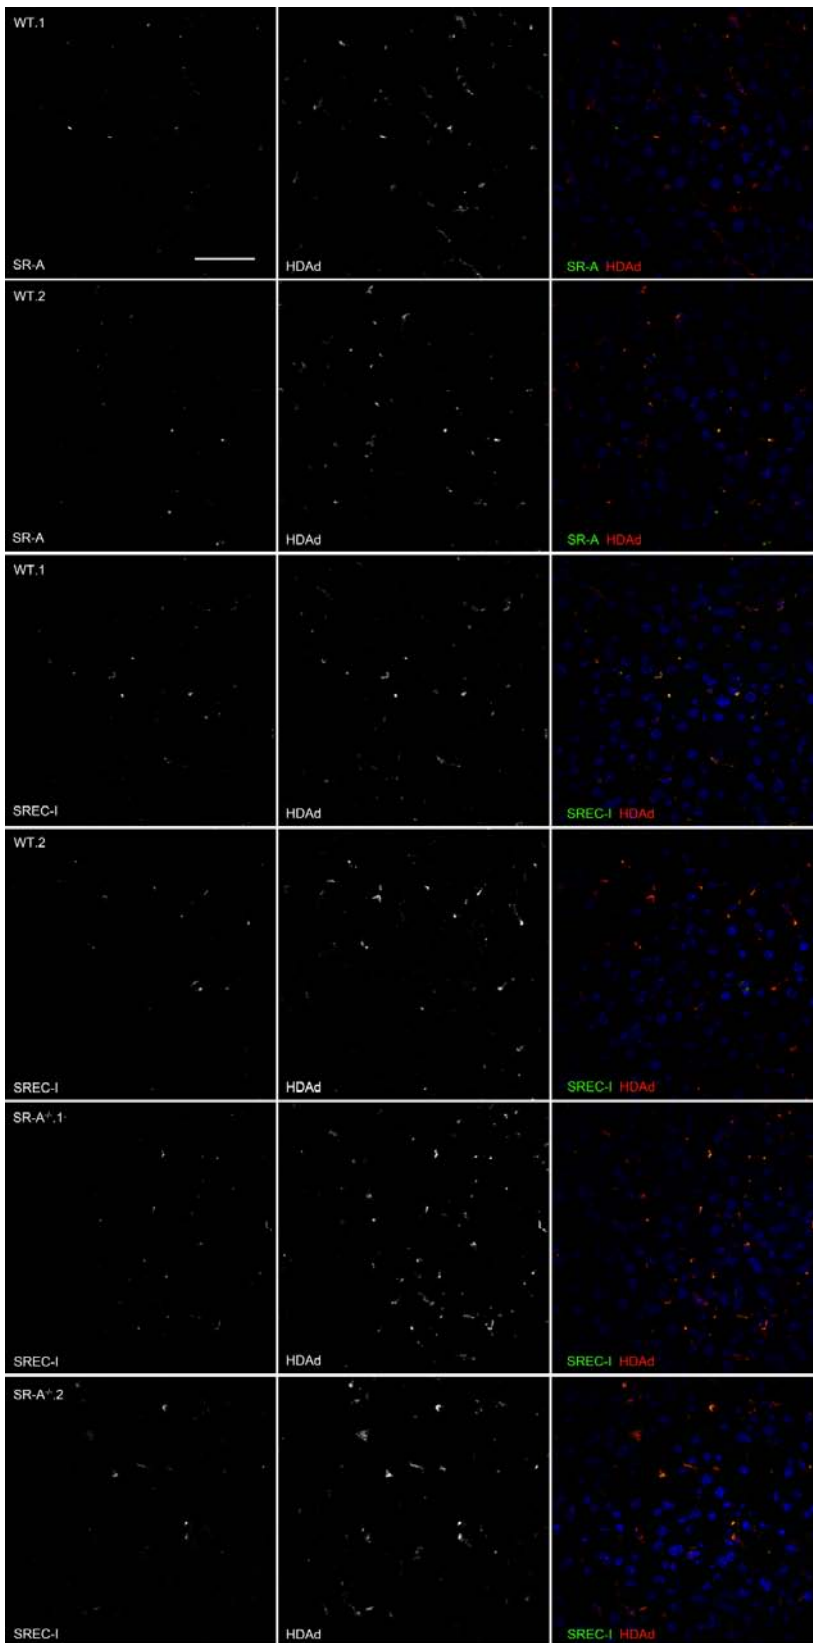

Split channels from figure 5. Livers from AlexaFluor-555 labeled-HDAd (*red*) injected wild type C57BL/6 (WT.1 and WT.2) and SR-A<sup>-/-</sup> mice (SR-A<sup>-/-</sup>.1 and SR-A<sup>-/-</sup>.2) were stained for SR-A

(*green*) and SREC-I (*green*) for confocal analysis. Nuclei were counterstained with DAPI (*blue*).

Scale bar: 50  $\mu\text{m}$ .

**Figure S4.** Controls for SR-A and SREC-I staining and Alexa555-HDAd autofluorescence.

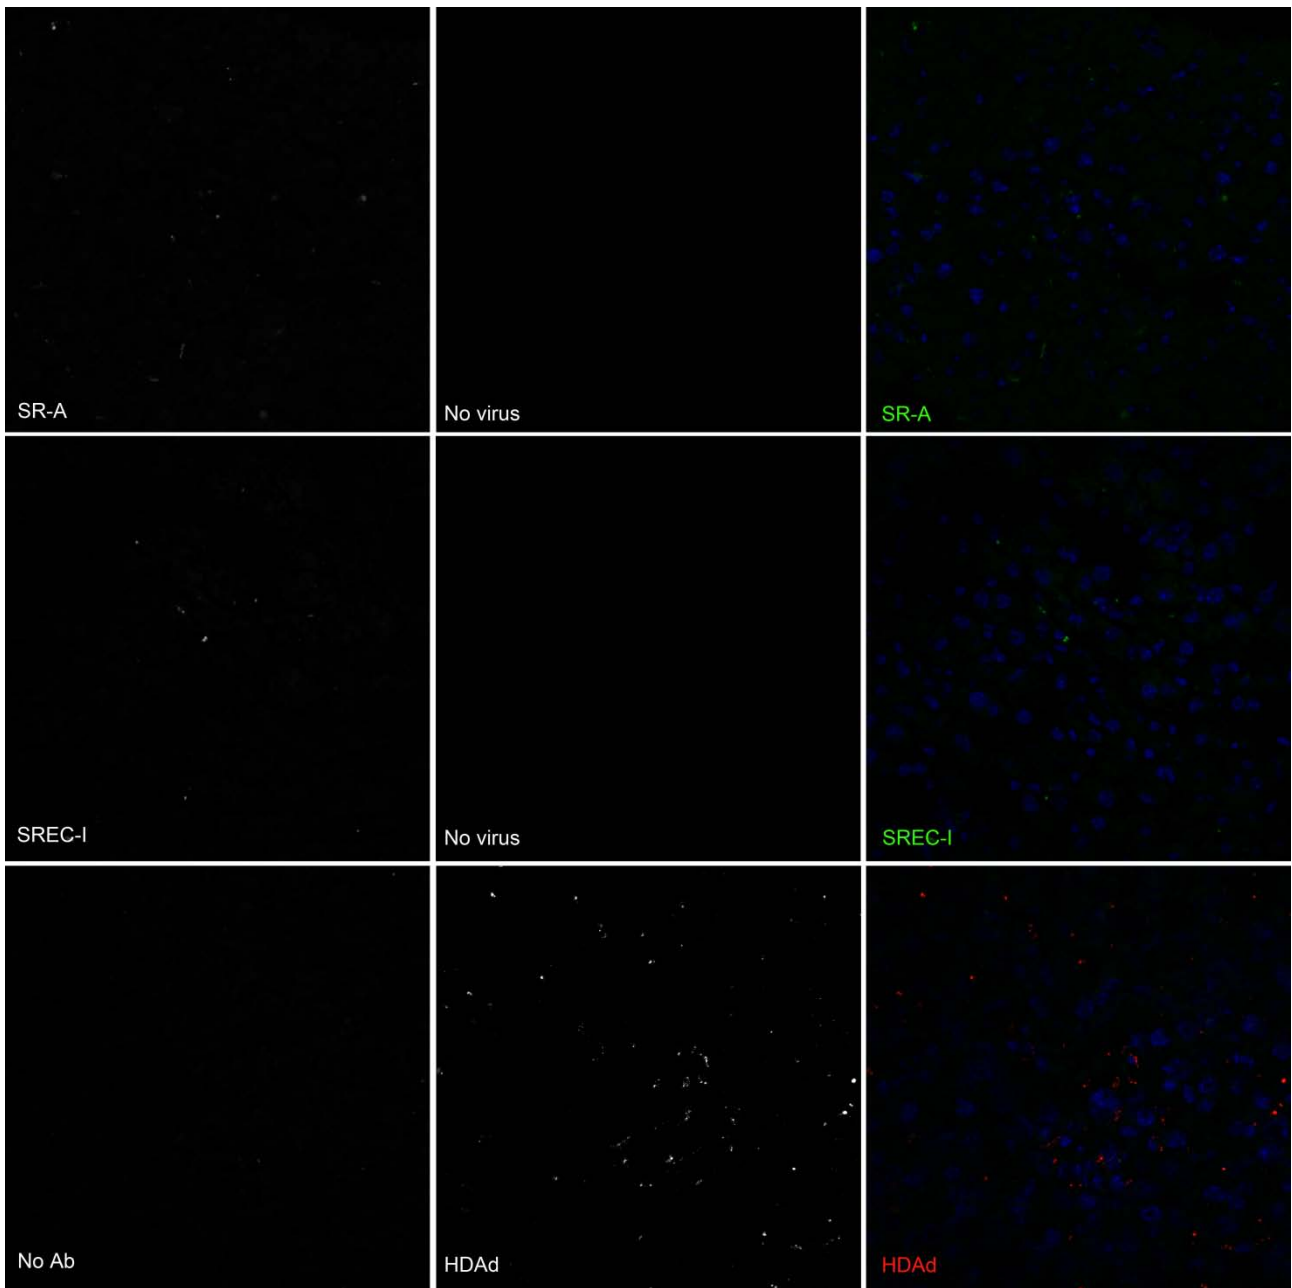

Livers from saline injected wild type C57BL/6 mice stained for SR-A (*green* - upper panels) or SREC-I (*green* - middle panels) and from Alexa555-HDAd injected mice (dose  $5 \times 10^{11}$  vp/kg) (*red* - lower panels). Green and red channels are visualized for each panel to rule out excitation cross-talk.

**Figure S5.** SR-A co-localizes with HDAd particles in both endothelial and Kupffer cells in the liver.

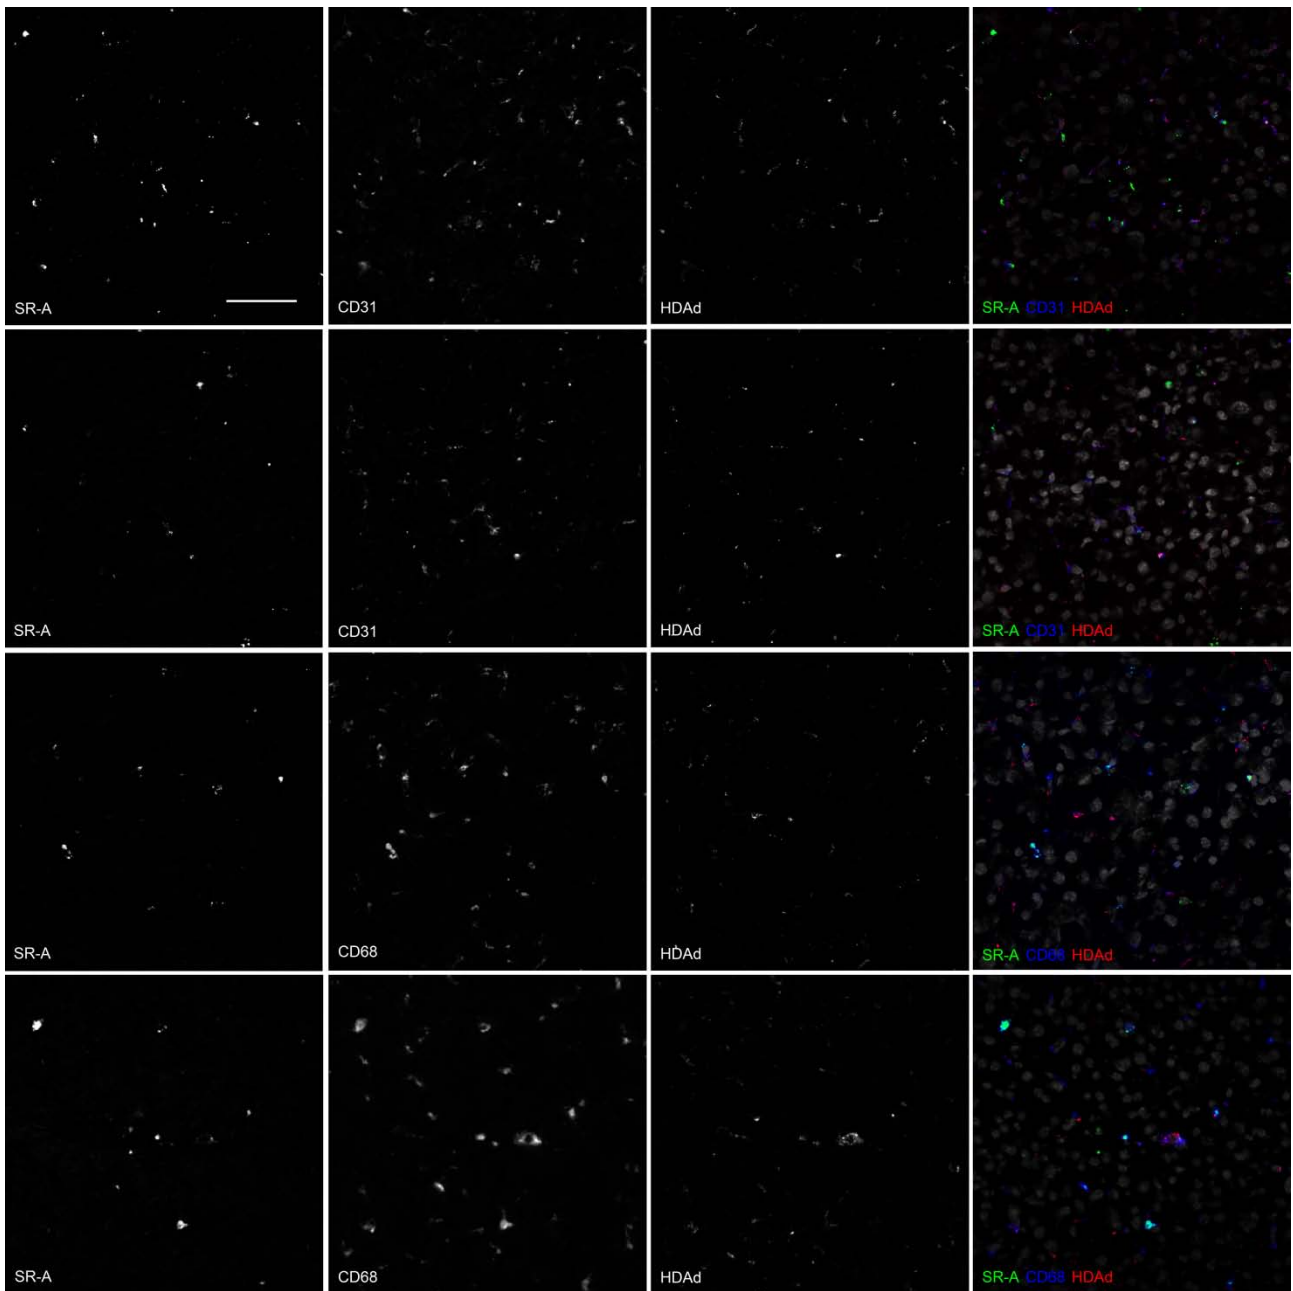

Split channels from Figure 6. Confocal analysis of livers from AlexaFluor-555 labeled-HDAd injected C57BL/6 wild type (WT.1 and WT.2) mice stained for SR-A (*green*) or CD31 (*blue*) or CD68 (*blue*), as markers of endothelial and Kupffer cells, respectively. SR-A-HDAd double positive signals were detected in both CD31<sup>+</sup> and CD68<sup>+</sup> cells. Scale bar: 50  $\mu$ m.

**Figure S6.** SREC-I co-localizes with HDAd particles in both endothelial and Kupffer cells in the liver.

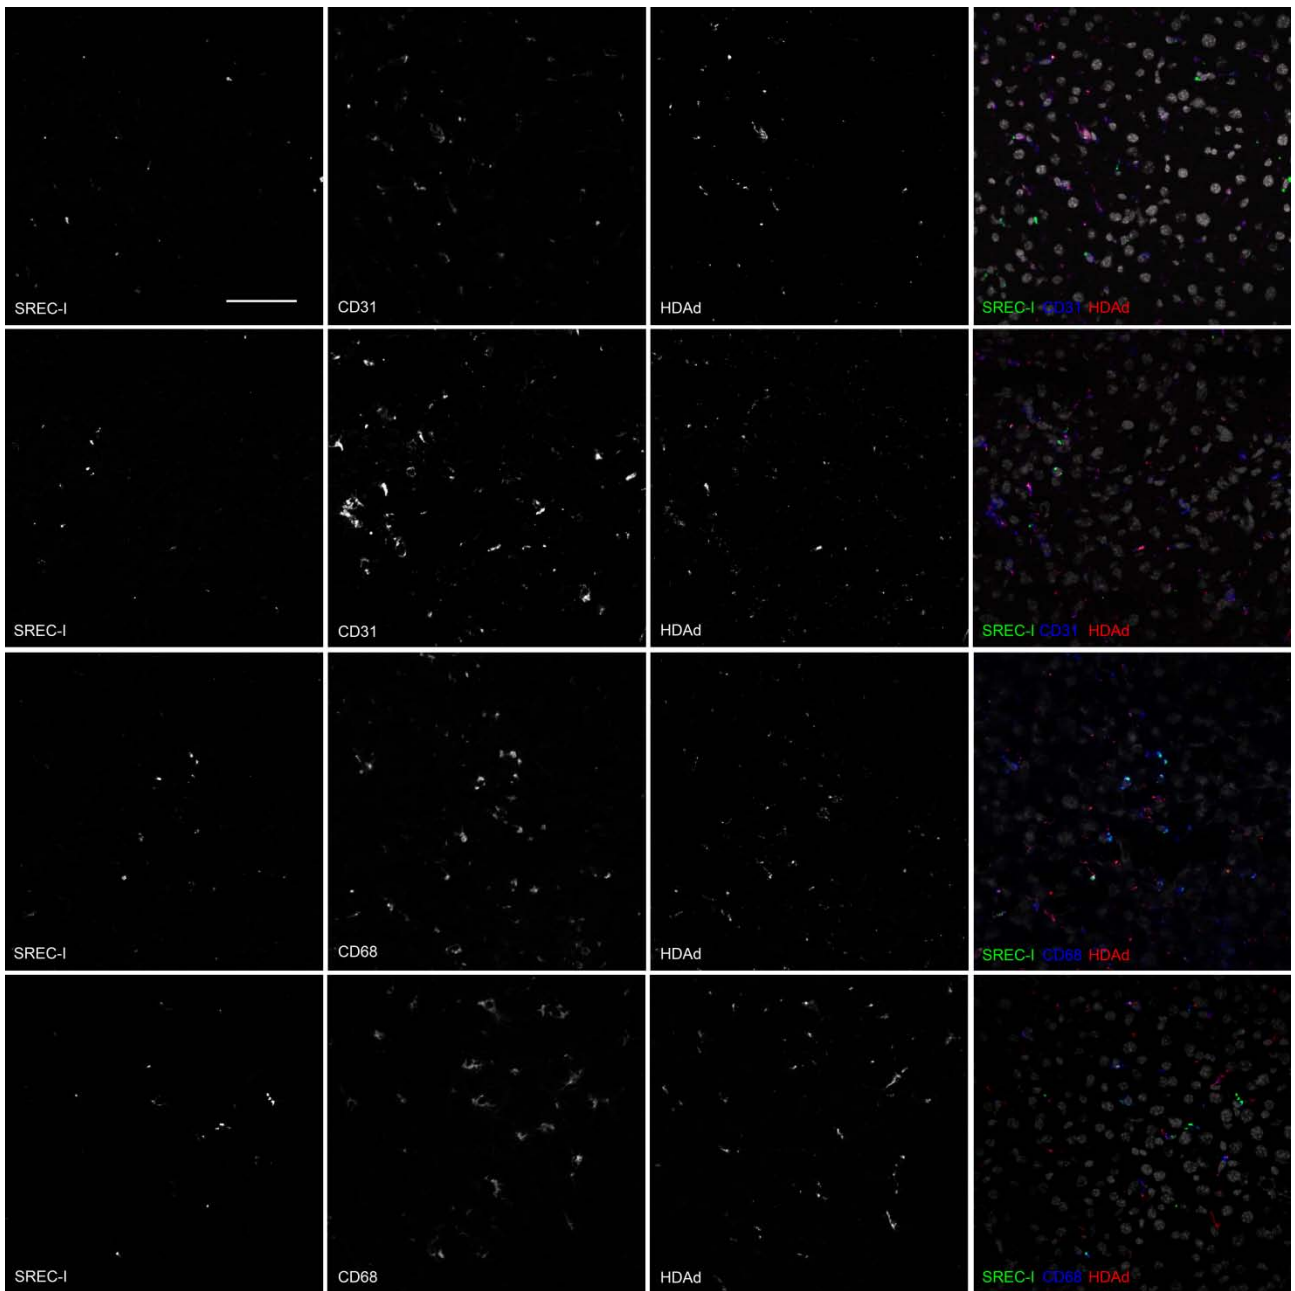

Split channels from figure 6. Confocal analysis of livers from AlexaFluor-555 labeled-HDAd injected wild type C57BL/6 mice (WT.1 and WT.2) stained for SREC-I (*green*) and CD31 (*blue*) or CD68 (*blue*), as markers of endothelial and Kupffer cells, respectively. SREC-I-HDAd double positive signals were detected in both CD31<sup>+</sup> and CD68<sup>+</sup> cells. Scale bar: 50  $\mu$ m.
